# Supplementary material for: Relationship Between Continuity of Care and Discharge Planning After Hospital Psychiatric Admission
Source: Atypon-hosted journal article supplement (doi:10.1176/appi.ps.201900233), 2019-10-08
Supplement: appi.ps.201900233.ds001.pdf [file appi.ps.201900233.ds001.pdf]

## Continuity of Care and Discharge Planning for Hospital Psychiatric Admissions

### Online Supplement

| Unadjusted and adjusted associations between demographic, clinical characteristics and attending an outpatient appointment within 7 days of discharge for the total sample of 189 psychiatric inpatients. |                       |                                                                               |         |                        |           |                     |           |
|-----------------------------------------------------------------------------------------------------------------------------------------------------------------------------------------------------------|-----------------------|-------------------------------------------------------------------------------|---------|------------------------|-----------|---------------------|-----------|
|                                                                                                                                                                                                           |                       | Attended outpatient appointment within 7 days following discharge (n=99, 52%) |         | Unadjusted regressions |           | Adjusted regression |           |
|                                                                                                                                                                                                           |                       | n                                                                             | % (Row) | OR                     | 95% CI    | OR                  | 95% CI    |
| <b>Communication with outpatient provider</b>                                                                                                                                                             | No                    | 28                                                                            | 39      | ref                    |           | ref                 |           |
|                                                                                                                                                                                                           | Yes                   | 71                                                                            | 60      | 2.32                   | 1.27-4.24 | 1.65                | 0.82-3.32 |
| <b>Attended outpatient mental health appointment in the 30 days prior to admission</b>                                                                                                                    | No                    | 46                                                                            | 44      | ref                    |           | ref                 |           |
|                                                                                                                                                                                                           | Yes                   | 53                                                                            | 62      | 2.09                   | 1.16-3.75 | 1.75                | 0.88-3.49 |
| <b>Age</b>                                                                                                                                                                                                | Youth (20 and under)  | 19                                                                            | 61      | ref                    |           | ref                 |           |
|                                                                                                                                                                                                           | Adult (21+)           | 80                                                                            | 51      | 0.65                   | 0.29-1.42 | 0.71                | 0.27-1.86 |
| <b>Gender</b>                                                                                                                                                                                             | Female                | 52                                                                            | 56      | ref                    |           | ref                 |           |
|                                                                                                                                                                                                           | Male                  | 47                                                                            | 49      | 0.76                   | 0.43-1.34 | 0.84                | 0.44-1.61 |
| <b>Race/ethnicity</b>                                                                                                                                                                                     | Black non-Hispanic    | 36                                                                            | 43      | ref                    |           | ref                 |           |
|                                                                                                                                                                                                           | Hispanic/Puerto Rican | 12                                                                            | 57      | 1.74                   | 0.66-4.58 | 1.38                | 0.48-3.93 |
|                                                                                                                                                                                                           | White non-Hispanic    | 41                                                                            | 62      | 2.14                   | 1.11-4.14 | 1.95                | 0.95-4.00 |
|                                                                                                                                                                                                           | Other/unknown         | 10                                                                            | 53      | 1.45                   | 0.53-3.94 | 1.19                | 0.40-3.53 |
| <b>Inpatient length of stay</b>                                                                                                                                                                           | 1-6 days              | 19                                                                            | 45      | ref                    |           | ref                 |           |
|                                                                                                                                                                                                           | 7-13 days             | 42                                                                            | 55      | 1.50                   | 0.70-3.19 | 1.57                | 0.69-3.56 |
|                                                                                                                                                                                                           | 14 days or longer     | 38                                                                            | 54      | 1.39                   | 0.65-3.00 | 1.63                | 0.67-3.95 |
| <b>Primary discharge diagnosis</b>                                                                                                                                                                        | Psychotic disorder    | 40                                                                            | 49      | ref                    |           | ref                 |           |
|                                                                                                                                                                                                           | Mood disorder         | 49                                                                            | 54      | 1.25                   | 0.69-2.29 | 1.19                | 0.59-2.39 |
|                                                                                                                                                                                                           | Other                 | 10                                                                            | 59      | 1.50                   | 0.52-4.32 | 1.74                | 0.49-6.14 |
| <b>Co-occurring substance use disorder</b>                                                                                                                                                                | No                    | 57                                                                            | 56      | ref                    |           | ref                 |           |
|                                                                                                                                                                                                           | Yes                   | 42                                                                            | 48      | 0.70                   | 0.40-1.25 | 0.92                | 0.49-1.74 |
